# Supplementary material
Source: HighWire-hosted journal article supplement (https://fmch.bmj.com/content/11/4/e002453)
Supplement: inline-supplementary-material-1 [file inline-supplementary-material-1.pdf]

## Supplemental

**Table 1:** Clinical diagnosis codes (based on 10th revision of the International Statistical Classification of Diseases and Related Health Problems or ICD-10 ) and lab-test codes (based on Logical Observation Identifiers Names and Codes or LOINC) used to determine the status of medically attended RSV infections in the TriNetX database.

| Variables     | Name, code                                                                                                                                                                  | Data type                                 |                                        |
|---------------|-----------------------------------------------------------------------------------------------------------------------------------------------------------------------------|-------------------------------------------|----------------------------------------|
| RSV infection | <ul style="list-style-type: none"> <li>Respiratory syncytial virus RNA [Presence] in Specimen by NAA with probe detection (LOINC code: 40988-8)</li> </ul>                  | positive/negative (LOINC lab result code) |                                        |
|               | <ul style="list-style-type: none"> <li>Respiratory syncytial virus RNA [Presence] in Nasopharynx by NAA with probe detection (LOINC code 76089-2)</li> </ul>                |                                           |                                        |
|               | <ul style="list-style-type: none"> <li>Respiratory syncytial virus RNA [Presence] in Nasopharynx by NAA with non-probe detection (LOINC code 82176-9)</li> </ul>            |                                           |                                        |
|               | <ul style="list-style-type: none"> <li>Respiratory syncytial virus RNA [Presence] in Respiratory specimen by NAA with probe detection (LOINC code 92131-2)</li> </ul>       |                                           |                                        |
|               | <ul style="list-style-type: none"> <li>Respiratory syncytial virus RNA [Presence] in Isolate by NAA with probe detection (LOINC code 60271-4)</li> </ul>                    |                                           |                                        |
|               | <ul style="list-style-type: none"> <li>Respiratory syncytial virus RNA [Presence] in Upper respiratory specimen by NAA with probe detection (LOINC code 85479-4)</li> </ul> |                                           |                                        |
|               | <ul style="list-style-type: none"> <li>Respiratory syncytial virus Ag [Presence] in Specimen (LOINC code 31950-9)</li> </ul>                                                |                                           | present/absent (ICD-10 diagnosis code) |
|               | <ul style="list-style-type: none"> <li>Respiratory syncytial virus Ag [Presence] in Nasopharynx by Rapid immunoassay (LOINC code 72885-7)</li> </ul>                        |                                           |                                        |
|               | <ul style="list-style-type: none"> <li>Respiratory syncytial virus Ag [Presence] in Nose (LOINC code 33045-6)</li> </ul>                                                    |                                           |                                        |
|               | <ul style="list-style-type: none"> <li>Respiratory syncytial virus Ab [Presence] in</li> </ul>                                                                              |                                           |                                        |

|                             |                                                                                                                                                                                                                                                                                                                                                                                                                                                                                                                                                                      |                |
|-----------------------------|----------------------------------------------------------------------------------------------------------------------------------------------------------------------------------------------------------------------------------------------------------------------------------------------------------------------------------------------------------------------------------------------------------------------------------------------------------------------------------------------------------------------------------------------------------------------|----------------|
|                             | <p>Serum<br/>(LOINC code 33390-6)</p> <ul style="list-style-type: none"> <li>• Respiratory syncytial virus Ag [Presence] in Specimen by Immunoassay (LOINC code 5876-8)</li> <li>• Respiratory syncytial virus Ag [Presence] in Specimen by Immunofluorescence (LOINC code 5877-6)</li> <li>• Respiratory syncytial virus as the cause of diseases classified elsewhere (ICD-10 code: B97.4)</li> <li>• Respiratory syncytial virus pneumonia (ICD-10 code: J12.1)</li> <li>• Acute bronchiolitis due to respiratory syncytial virus (ICD-10 code: J21.0)</li> </ul> |                |
| Bronchiolitis, non-specific | <ul style="list-style-type: none"> <li>• Acute bronchiolitis, unspecified (ICD-10 code J21.9)</li> </ul>                                                                                                                                                                                                                                                                                                                                                                                                                                                             | present/absent |
